# Supplementary material for: Endonuclease-like activity of the N-terminal domain of Euplotes octocarinatus centrin
Source: Royal Society of Chemistry journal article supplement (doi:10.1039/c7ra07907a), 2017-01-01
Supplement: c7ra07907a1.pdf [file c7ra07907a1.pdf]

### Endonuclease-like activity of N-terminal domain of *Euplotes octocarinatus* centrin

Wenlong Zhang <sup>a</sup> · Enxian Shi <sup>a,b</sup> · Yanan Feng <sup>a</sup> · Yaqin Zhao <sup>a</sup> and Binsheng Yang <sup>\*a</sup>

**Fig. S1**

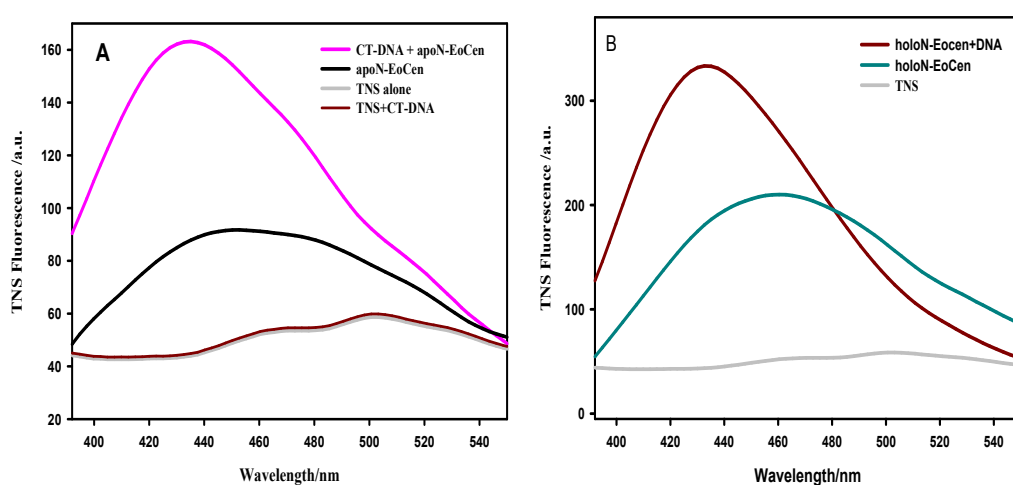

**Fig. S1** Steady-state fluorescence spectra of TNS bound to apoN-EoCen (a, 10  $\mu$ M) or holoN-EoCen (b, 10  $\mu$ M,  $[\text{Ca}^{2+}] = 2$  mM) in the presence or absence of CT-DNA ( $[\text{bp}] = 0.35$  mM) in 10 mM Hepes buffer (pH 7.4) at room temperature, the spectra of TNS and TNS-CT-DNA in buffer were shown in S1a, the concentration of TNS was 10  $\mu$ M. The protein and CT-DNA mixed solution was equilibrated for 10 min before the addition of TNS

**Fig. S2**

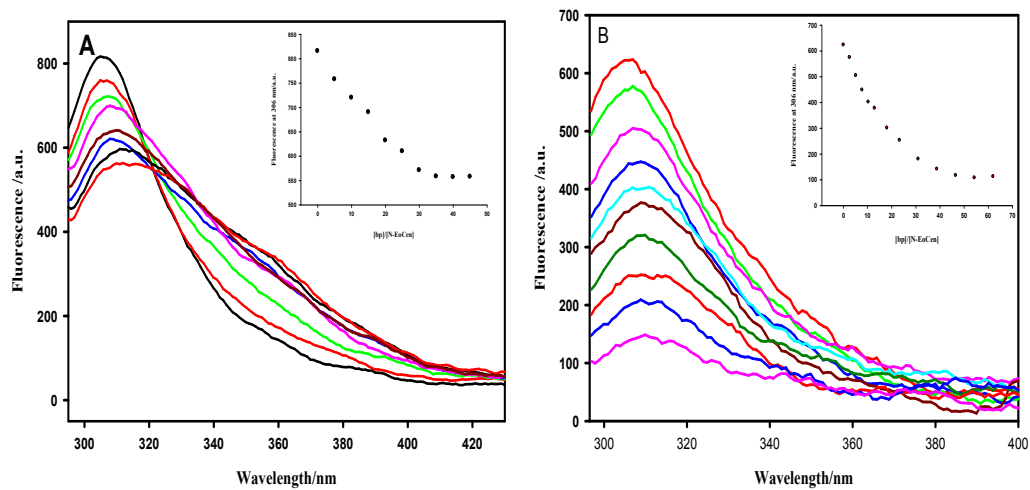

**Fig. S2** Fluorescence spectra of apoN-EoCen (a) or holoN-EoCen (b) titrated with increasing concentration of CT-DNA from 0 to 0.45 mM in 10 mM HEPES buffer (pH 7.4) at room temperature. Inset, the plot of fluorescence intensities at 306 nm as a function of [bp]/[N-EoCen] ratio

**Fig. S3**

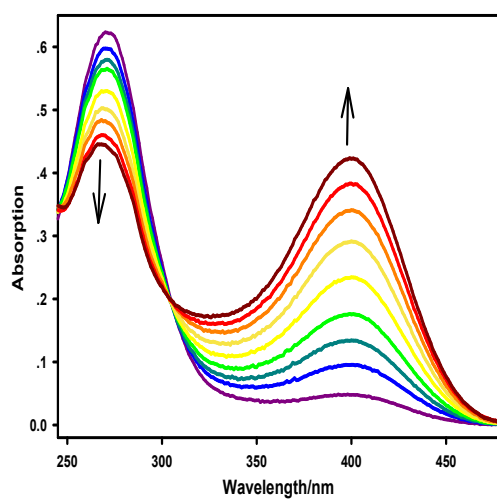

**Fig. S3** UV-vis spectra of apoN-EoCen (1  $\mu$ M) catalyzed hydrolysis of 4NPA (0.5 mM) in 10 mM Tris-HCl, pH 7.0, 25  $^{\circ}$ C. The loss of 4NPA and formation of 4-nitrophenoxide are observed at 270 and 400 nm, respectively, and an isobestic point is observable at 303 nm.
